# Supplementary material for: Structural basis of mitochondrial membrane bending by the I–II–III2–IV2 supercomplex
Source: PubMed Central journal article supplement (PMC10060162; doi:10.1038/s41586-023-05817-y), 2023-03-22
Supplement: 41586_2023_5817_MOESM1_ESM.pdf [file 41586_2023_5817_MOESM1_ESM.pdf]

---

**Supplementary information**

---

**Structural basis of mitochondrial membrane bending by the I–II–III<sub>2</sub>–IV<sub>2</sub> supercomplex**

---

In the format provided by the authors and unedited

# Structural basis of mitochondrial membrane bending by I-II-III<sub>2</sub>-IV<sub>2</sub> supercomplex

Alexander Mühleip<sup>1†</sup>, Rasmus Kock Flygaard<sup>1,2†</sup>, Rozbeh Baradaran<sup>1,3</sup>, Outi Haapanen<sup>4</sup>, Thomas Gruhl<sup>5</sup>, Victor Tobiasson<sup>1</sup>, Amandine Maréchal<sup>5,6</sup>, Vivek Sharma<sup>4,7</sup>, Alexey Amunts<sup>1\*</sup>

<sup>1</sup> Science for Life Laboratory, Department of Biochemistry and Biophysics, Stockholm University, 17165 Solna, Sweden.

<sup>2</sup> Current address: Department of Molecular Biology and Genetics, Danish Research Institute of Translational Neuroscience - DANDRITE, Nordic EMBL Partnership for Molecular Medicine, Aarhus University, 8000 Aarhus C, Denmark.

<sup>3</sup> Current address: MRC Laboratory of Molecular Biology, Cambridge, United Kingdom.

<sup>4</sup> Department of Physics, University of Helsinki, 00014 Helsinki, Finland.

<sup>5</sup> Institute of Structural and Molecular Biology, Birkbeck College, London, WC1E 7HX, UK.

<sup>6</sup> Institute of Structural and Molecular Biology, University College London, London, WC1E 6BT, UK.

<sup>7</sup> HiLIFE Institute of Biotechnology, University of Helsinki, 00014 Helsinki, Finland.

† These authors contributed equally to this work.

\* Correspondence to: [amunts@scilifelab.se](mailto:amunts@scilifelab.se)

## SUPPLEMENTARY INFORMATION

### **Table of contents:**

**SI Table 1. Data collection and model statistics**

**SI Table 2. List of proteins and comments**

**Supplementary Video 1. Coarse-grained molecular dynamics simulation of the *T. thermophila* supercomplex.** First 800 ns of the MD simulation starting from an initially planar membrane reveals a deformation of the bilayer into a curved topology to accommodate the membrane protein complex.

**Supplementary Video 2. Coarse-grained molecular dynamics simulation of pure lipid bilayer.** Membrane shows fluctuations, however, a stable curved architecture (as in the case of supercomplex) is not observed.

**Supplementary Video 3. Annular lipid shell of the *T. thermophila* supercomplex.** Final frame of the coarse-grained MD-simulation with supercomplex and surrounding annular lipids shown, highlighting the curved shape of the lipid belt.

**Source data for Extended Data Figure 2.**

**Supplementary Information Table 1. Data collection and model statistics**

| Data collection                       | CI          | CII    | CIII <sub>2</sub> | CIV <sub>2</sub> | CI-II-III <sub>2</sub> -IV <sub>2</sub> |
|---------------------------------------|-------------|--------|-------------------|------------------|-----------------------------------------|
| <b>Microscope</b>                     | Titan Krios |        |                   |                  |                                         |
| <b>Voltage (kV)</b>                   | 300         |        |                   |                  |                                         |
| <b>Camera</b>                         | K2 Summit   |        |                   |                  |                                         |
| <b>Magnification</b>                  | 165,000     |        |                   |                  |                                         |
| <b>Exposure (e-/Å<sup>2</sup>)</b>    | 30.9        |        |                   |                  |                                         |
| <b>Pixel size (Å)</b>                 | 0.83        |        |                   |                  |                                         |
| <b>Defocus range (µm)</b>             | 0.6-2.6     |        |                   |                  |                                         |
| <b>Movies collected</b>               | 26,063      |        |                   |                  |                                         |
| <b>Frames / movie</b>                 | 20          |        |                   |                  |                                         |
| <b>Data processing</b>                |             |        |                   |                  |                                         |
| <b>Initial particles</b>              | 1,664,103   |        |                   |                  |                                         |
| <b>Final particles</b>                | 138,746     |        |                   |                  |                                         |
| <b>Symmetry</b>                       | C1          | C1     | C1                | C1               | C1                                      |
| <b>Map resolution (Å)</b>             | 2.9         | 2.8    | 2.8               | 2.6              | 2.9                                     |
| <b>- FSC threshold</b>                | 0.143       | 0.143  | 0.143             | 0.143            | 0.143                                   |
| <b>B-factor sharpening</b>            | 46.8        | 49.1   | 52.2              | 45.4             | 49.9                                    |
| <b>EMDB ID</b>                        | EMD-        | EMD-   | EMD-              | EMD-             | EMD-                                    |
| <b>Model refinement statistics</b>    |             |        |                   |                  |                                         |
| <b>CC (map/model)</b>                 | 0.82        | 0.82   | 0.81              | 0.84             | 0.79                                    |
| <b>Resolution (map/model)</b>         | 2.99        | 3.3    | 3.18              | 2.89             | 3.36                                    |
| <b>- FSC threshold</b>                | 0.5         | 0.5    | 0.5               | 0.5              | 0.5                                     |
| <b>Atoms (not H)</b>                  | 234277      | 41399  | 94264             | 436066           | 806006                                  |
| <b>Residues</b>                       | 13712       | 2409   | 5438              | 23792            | 45351                                   |
| <b>Lipids/CoQ</b>                     | 59/0        | 11/1   | 32/3              | 214/8            | 316/12                                  |
| <b>Model B-factor (Å<sup>2</sup>)</b> |             |        |                   |                  |                                         |
| - <b>Protein</b>                      | 53.2        | 100.46 | 65.66             | 52.8             | 91.23                                   |
| - <b>Ligands</b>                      | 63.83       | 107.88 | 78.66             | 72.16            | 111.10                                  |
| <b>Rotamer outliers (%)</b>           | 0.51%       | 0.62%  | 0.53%             | 1.18%            | 0.76                                    |
| <b>Ramachandran (%)</b>               |             |        |                   |                  |                                         |
| - <b>Outliers</b>                     | 0.01%       | 0.21%  | 0.00%             | 0.01%            | 0.02%                                   |
| - <b>Allowed</b>                      | 2.07%       | 3.28%  | 2.43%             | 1.75%            | 1.77                                    |
| - <b>Favoured</b>                     | 97.92%      | 96.51% | 97.57%            | 98.25%           | 98.22                                   |
| <b>Clash score</b>                    | 4.12        | 3.91   | 5.68              | 4.22             | 4.63                                    |
| <b>MolProbity score</b>               | 1.21        | 1.41   | 1.40              | 1.26             | 1.24                                    |
| <b>RMSD</b>                           |             |        |                   |                  |                                         |
| - <b>Bonds (Å)</b>                    | 0.002       | 0.004  | 0.002             | 0.002            | 0.002                                   |
| - <b>Angles (°)</b>                   | 0.407       | 0.459  | 0.447             | 0.503            | 0.562                                   |
| <b>PDB ID</b>                         |             |        |                   |                  |                                         |

**Supplementary Information Table 2. List of proteins and comments**

| <b>Subunit name</b> | <b>Gene name</b> | <b>UniProt ID</b> | <b>Encoded</b> | <b>Residues in total</b> | <b>Comments</b>                            |
|---------------------|------------------|-------------------|----------------|--------------------------|--------------------------------------------|
| <b>Complex-I:</b>   |                  |                   |                |                          |                                            |
| ND1a                | nad1_a           | Q950Y3            | mt             | 284                      | Corresponds to NuoH, Nqo8                  |
| ND1b                | nad1_b           | NP_149380         | mt             | 59                       | Mt-ND1 C-terminal extension, separate gene |
| ND2a                | ymf65            | Q951A3            | mt             | 360                      | Corresponds to NuoN, Nqo14                 |
| ND2b                | nad2             | Q951B2            | mt             | 178                      | Mt-ND2 C-terminal extension, separate gene |
| Mt-ND3              | nad3             | Q950Z7            | mt             | 121                      | Corresponds to NuoA, Nqo7                  |
| ND4                 | nad4             | Q950X9            | mt             | 505                      | Corresponds to NuoM, Nqo13                 |
| MT-ND4L             | ymf58            | Q950Z5            | mt             | 116                      | Corresponds to NuoK, Nqo11                 |
| ND5a                | nad5             | Q950Z0            | mt             | 750                      | Corresponds to NuoL, Nqo12                 |
| ND5b                | ymf57            | Q951C2            | mt             | 100                      | Mt-ND5 C-terminal extension, separate gene |
| ND6                 | ymf62            | Q950Y2            | mt             | 255                      | Corresponds to NuoJ, Nqo10                 |
| NDUV1               | TTHERM_00193910  | Q23KE4            | nuclear        | 474                      | Corresponds to NuoF, Nqo1                  |
| NDUV2               | TTHERM_00335630  | I7MEP0            | nuclear        | 274                      | Corresponds to NuoE, Nqo2                  |

|       |                      |        |         |     |                                                         |
|-------|----------------------|--------|---------|-----|---------------------------------------------------------|
| NDUS1 | TTHERM_00194<br>260  | Q23KA9 | nuclear | 718 | Corresponds to NuoG,<br>Nqo3                            |
| NDUS2 | nad7                 | Q951B1 | mt      | 442 | Corresponds to NuoD,<br>Nqo4                            |
| NDUS3 | nad9_2               | Q950Z3 | mt      | 198 | Corresponds to NuoC,<br>Nqo5                            |
| NDUS4 | TTHERM_00526<br>930  | I7MK61 | nuclear | 185 | Corresponds to AQDQ<br>subunit                          |
| NDUS5 | TTHERM_00012<br>9647 | W7X4R4 | nuclear | 94  |                                                         |
| NDUS6 | TTHERM_00497<br>570  | I7MK02 | nuclear | 132 | Zinc-finger protein,<br>contains a Zn <sup>2+</sup> ion |
| NDUS7 | nad10                | Q951B4 | mt      | 162 | Corresponds to NuoB,<br>Nqo6                            |
| NDUS8 | TTHERM_00294<br>640  | I7MDW5 | nuclear | 236 | Corresponds to NuoI,<br>Nqo9                            |
| NDUA1 | TTHERM_00455<br>560  | I7MI60 | nuclear | 94  |                                                         |
| NDUA2 | TTHERM_00659<br>070  | I7MA77 | nuclear | 103 |                                                         |
| NDUA3 | TTHERM_00148<br>710  | I7M9B3 | nuclear | 135 |                                                         |
| NDUA5 | TTHERM_01161<br>000  | Q23ND5 | nuclear | 206 |                                                         |
| NDUA6 | TTHERM_00933<br>070  | I7M2Y3 | nuclear | 172 |                                                         |
| NDUA7 | TTHERM_00399<br>360  | I7MIJ7 | nuclear | 282 |                                                         |
| NDUA8 | TTHERM_00464<br>930  | I7MMF4 | nuclear | 238 |                                                         |

|              |                      |        |         |     |                                                                    |
|--------------|----------------------|--------|---------|-----|--------------------------------------------------------------------|
| NDUA9        | TTHERM_00557<br>760  | I7MLH2 | nuclear | 362 | NAD-dependent epimerase/dehydratase family protein                 |
| NDUA11       | TTHERM_00945<br>210  | Q24F24 | nuclear | 213 |                                                                    |
| NDUA12       | TTHERM_00194<br>499  | A4VDQ6 | nuclear | 194 |                                                                    |
| NDUA13       | TTHERM_00149<br>260  | I7M2U4 | nuclear | 175 |                                                                    |
| NDUAB1<br>-α | TTHERM_01005<br>100  | Q22XT6 | nuclear | 138 | Different isoform to NDUAB1-β                                      |
| NDUAB1<br>-β | TTHERM_00470<br>710  | I7MD12 | nuclear | 133 | Acyl carrier protein                                               |
| NDUB3        | TTHERM_00446<br>569  | A4VD20 | nuclear | 83  |                                                                    |
| NDUB4        | TTHERM_00310<br>880  | I7MG29 | nuclear | 126 |                                                                    |
| NDUB6        | TTHERM_00430<br>000  | Q231G0 | nuclear | 129 |                                                                    |
| NDUB7        | TTHERM_00402<br>070  | I7MIM0 | nuclear | 120 |                                                                    |
| NDUB8        | TTHERM_00481<br>330  | I7M855 | nuclear | 207 |                                                                    |
| NDUB9        | TTHERM_00985<br>010  | Q233X7 | nuclear | 189 |                                                                    |
| NDUB10       | TTHERM_00193<br>750  | Q23KG0 | nuclear | 188 |                                                                    |
| NDUB11       | TTHERM_00114<br>380  | Q22Z32 | nuclear | 214 |                                                                    |
| NDUB15       | TTHERM_00061<br>4679 | -      | nuclear | 147 | Wrong gene annotation – change translation ORF to 5'-3' in frame 3 |

|        |                     |        |         |     |                                                      |
|--------|---------------------|--------|---------|-----|------------------------------------------------------|
| NDUC2  | TTHERM_00160<br>690 | Q22W63 | nuclear | 102 |                                                      |
| NDUCA1 | TTHERM_00136<br>440 | I7M8Q7 | nuclear | 346 | carbonic anhydrase-like protein (isoform 1)          |
| NDUCA2 | TTHERM_01005<br>010 | Q22XU5 | nuclear | 257 | carbonic anhydrase-like protein (isoform 2)          |
| NDUCA3 | TTHERM_00541<br>460 | I7M6S0 | nuclear | 233 | carbonic anhydrase-like protein (isoform 3)          |
| NDUX1  | TTHERM_00715<br>850 | I7LT42 | nuclear | 150 |                                                      |
| NDUFX  | TTHERM_00161<br>210 | Q22W11 | nuclear | 172 | 2Fe2S cluster-binding protein                        |
| NDUTX  | TTHERM_01205<br>250 | Q22AI5 | nuclear | 166 | Thioredoxin, TRX family                              |
| NDUJ1  | TTHERM_00938<br>750 | Q22DR7 | nuclear | 317 | DnaJ domain protein                                  |
| NDUPH1 | TTHERM_00697<br>370 | Q24C39 | nuclear | 251 |                                                      |
| NDUPH2 | TTHERM_00193<br>950 | Q23KE0 | nuclear | 189 |                                                      |
| NDUTT1 | TTHERM_00925<br>340 | Q22E24 | nuclear | 516 | lipid A-disaccharide synthase                        |
| NDUTT2 | TTHERM_01000<br>190 | Q24HK5 | nuclear | 333 | Acyl-CoA synthetase (AMP-forming)/AMP-acid ligase II |
| NDUTT3 | TTHERM_00268<br>000 | I7LUQ4 | nuclear | 311 |                                                      |
| NDUTT4 | TTHERM_00295<br>430 | I7MIE0 | nuclear | 212 |                                                      |
| NDUTT5 | TTHERM_00649<br>080 | I7LT77 | nuclear | 205 |                                                      |

|             |                      |        |         |     |                                                                                                                                                                           |
|-------------|----------------------|--------|---------|-----|---------------------------------------------------------------------------------------------------------------------------------------------------------------------------|
| NDUTT6      | TTHERM_00334<br>340  | I7M1N8 | nuclear | 144 |                                                                                                                                                                           |
| NDUTT7      | TTHERM_00637<br>590  | Q22HE4 | nuclear | 143 |                                                                                                                                                                           |
| NDUTT8      | TTHERM_00006<br>120  | Q22SC4 | nuclear | 135 |                                                                                                                                                                           |
| NDUTT9      | TTHERM_00653<br>670  | Q23B10 | nuclear | 136 |                                                                                                                                                                           |
| NDUTT1<br>0 | TTHERM_00616<br>320  | I7MAF0 | nuclear | 127 |                                                                                                                                                                           |
| NDUTT1<br>1 | TTHERM_00185<br>570  | Q22T55 | nuclear | 113 |                                                                                                                                                                           |
| NDUTT1<br>2 | TTHERM_00835<br>330  | Q22E95 | nuclear | 93  |                                                                                                                                                                           |
| NDUTT1<br>3 | TTHERM_00992<br>800  | Q22DC2 | nuclear | 73  |                                                                                                                                                                           |
| NDUTT1<br>4 | TTHERM_00399<br>460  | I7MIK1 | nuclear | 71  |                                                                                                                                                                           |
| NDUTT1<br>5 | TTHERM_00063<br>7389 | -      | nuclear | 237 | Wrong gene annotation –<br>change translation ORF<br>to 3'-5' in frame 1<br>Binds ADP-Mg <sup>2+</sup>                                                                    |
| NDUTT1<br>6 | TTHERM_00124<br>3407 | W7XFJ5 | nuclear | 119 | Is required for I-IV <sub>2</sub><br>interface stability.<br>Stabilises ND5a Nt<br>extension.<br>Wrong gene annotation –<br>change translation ORF<br>to 3'-5' in frame 3 |
| NDUTT1<br>7 | TTHERM_00053<br>2499 | -      | nuclear | 125 | Wrong gene annotation –<br>change translation ORF<br>to 3'-5' in frame 2                                                                                                  |



| <b>Complex-II:</b> |                                 |        |         |     |                                                                          |
|--------------------|---------------------------------|--------|---------|-----|--------------------------------------------------------------------------|
| SDHA               | TTHERM_00047080                 | Q23DI3 | nuclear | 636 |                                                                          |
| SDHB               | TTHERM_00241700                 | I7M403 | nuclear | 312 |                                                                          |
| SDHC               | TTHERM_00387120                 | Q23RH8 | nuclear | 60  |                                                                          |
| SDHD               | AF396436.1 (mt-genome sequence) | -      | mt      | 43  | Gene lies between ymf66 and ymf76 on mtDNA. Translation 3'-5' in frame 1 |
| SDHTT1             | TTHERM_00571650                 | Q24I09 | nuclear | 322 | contains heme c                                                          |
| SDHTT2             | TTHERM_00532090                 | Q248F8 | nuclear | 296 |                                                                          |
| SDHTT3             | TTHERM_00283850                 | I7MEX7 | nuclear | 198 |                                                                          |
| SDHTT4             | TTHERM_00658950                 | I7LX66 | nuclear | 195 | Diphthamide synthesis protein                                            |
| SDHTT5             | TTHERM_00601860                 | Q22YL0 | nuclear | 114 |                                                                          |
| SDHTT6             | TTHERM_00626980                 | Q23S01 | nuclear | 103 |                                                                          |
| SDHTT7             | TTHERM_00713350                 | Q24CW6 | nuclear | 93  |                                                                          |
| SDHTT8             | TTHERM_000287919                | W7XBF5 | nuclear | 89  |                                                                          |
| SDHTT9             | TTHERM_00637670                 | Q22HD6 | nuclear | 76  |                                                                          |
| SDHTT10            | TTHERM_001034353                | W7XF00 | nuclear | 62  |                                                                          |

|                          |                                       |        |         |     |                                                |
|--------------------------|---------------------------------------|--------|---------|-----|------------------------------------------------|
| SDHTT11                  | DY684362.1<br>(EST, mRNA<br>sequence) | -      | nuclear | 46  | Gene translation should<br>be 3'-5' in frame 1 |
| <b>Complex-<br/>III:</b> |                                       |        |         |     |                                                |
| MPP-β                    | TTHERM_00502<br>380                   | I7MGU2 | nuclear | 513 |                                                |
| MPP-α                    | TTHERM_00836<br>690                   | I7MJ25 | nuclear | 482 |                                                |
| COB                      | cob                                   | Q950Z1 | mt      | 426 | contains heme bL and bH                        |
| CYC1                     | TTHERM_00918<br>500                   | Q24IM5 | nuclear | 319 | Contains heme c                                |
| UQCRFS<br>1              | TTHERM_00295<br>080                   | I7MIC7 | nuclear | 269 | Contains 2Fe2S cluster                         |
| UQCRH                    | TTHERM_00194<br>690                   | Q23K66 | nuclear | 86  | cytochrome bc1 hinge<br>proteins               |
| UQCRQ                    | TTHERM_00765<br>330                   | I7M484 | nuclear | 130 |                                                |
| UQCR9                    | TTHERM_00456<br>790                   | I7MM45 | nuclear | 119 |                                                |
| UQCR10                   | TTHERM_00218<br>930                   | I7MFL6 | nuclear | 62  |                                                |
| UQCRTT<br>1              | TTHERM_00382<br>330                   | Q23F81 | nuclear | 328 |                                                |
| UQCRTT<br>2              | EV837551.1<br>(EST, mRNA<br>sequence) | -      | nuclear | 41  | Gene translation should<br>be 5'-3' in frame 3 |
| UQCRTT<br>3              | -                                     | -      | -       | 66  | Unidentified subunit                           |

| <b>Complex-IV:</b> |                 |        |         |     |                                          |
|--------------------|-----------------|--------|---------|-----|------------------------------------------|
| COX1               | cox1            | Q950Y4 | mt      | 688 |                                          |
| COX2               | cox2            | Q950Y9 | mt      | 604 |                                          |
| COX3a              | yfm67           | Q950Y7 | mt      | 453 | structurally replaces H1 of COX3         |
| COX3b              | yfm68           | Q950Y6 | mt      | 594 |                                          |
| COX5B              | THERM_00378620  | Q23FF5 | nuclear | 637 |                                          |
| COX6A              | THERM_000723218 | W7XCY5 | nuclear | 130 |                                          |
| COX6B              | THERM_00568030  | Q24I72 | nuclear | 230 |                                          |
| COX6C              | THERM_00046170  | Q23DS4 | nuclear | 103 |                                          |
| COX7A              | THERM_00151250  | I7MGF9 | nuclear | 133 |                                          |
| COX7C              | THERM_000470561 | W7X287 | nuclear | 236 |                                          |
| COX6BL             | THERM_00218340  | I7LVX0 | nuclear | 88  |                                          |
| COX17L             | THERM_01043280  | Q22CI1 | nuclear | 990 | CTF/NF-I domain-containing protein       |
| NDUA4              | THERM_001001528 | W7WZP1 | nuclear | 220 | (Named COXTT13 in Zhou et al.)           |
| COXMC1             | THERM_00127269  | A4VDV3 | nuclear | 346 | Oxoglutarate/malate translocator protein |

|             |                      |            |         |     |                                                    |
|-------------|----------------------|------------|---------|-----|----------------------------------------------------|
| COXMC2      | TTHERM_00621<br>600  | Q23M99     | nuclear | 318 | 2-oxoglutarate/malate<br>carrier protein           |
| COXMC3      | TTHERM_00112<br>650  | Q22ZA6     | nuclear | 330 |                                                    |
| COXBP       | TTHERM_00016<br>360  | Q22RF2     | nuclear | 685 | BBC53 chromosome<br>condensation regulator<br>RCC1 |
| COXTIM<br>1 | TTHERM_00052<br>8460 | W7X3D6     | nuclear | 72  | Tim10/DDP family zinc<br>finger proteins           |
| COXTIM<br>2 | TTHERM_00070<br>3379 | W7XDM<br>6 | nuclear | 72  | part of TIM9.10 hexamer                            |
| COXTIM<br>3 | TTHERM_00433<br>490  | Q231A8     | nuclear | 93  | part of TIM9.10 hexamer                            |
| COXTIM<br>4 | TTHERM_01289<br>060  | Q22A35     | nuclear | 68  | part of TIM9.10 hexamer                            |
| COXTIM<br>5 | TTHERM_00028<br>510  | Q22N23     | nuclear | 81  | part of TIM9.10 hexamer                            |
| COXTIM<br>6 | TTHERM_00805<br>850  | Q233U0     | nuclear | 72  | part of TIM9.10 hexamer                            |
| COXFS       | TTHERM_00133<br>510  | I7M8P0     | nuclear | 188 | Fe-binding zinc finger<br>CDGSH type protein       |
| COXAC       | TTHERM_00695<br>750  | Q24C97     | nuclear | 127 |                                                    |
| Ymf70       | ymf70                | Q950Y0     | mt      | 89  |                                                    |
| Ymf75       | ymf75                | Q951A7     | mt      | 190 |                                                    |
| COXTT1      | TTHERM_00361<br>490  | Q22PJ5     | nuclear | 490 |                                                    |
| COXTT2      | TTHERM_00721<br>790  | Q22FX8     | nuclear | 473 | Protein phosphatase 2C                             |

|         |                      |        |         |     |                      |
|---------|----------------------|--------|---------|-----|----------------------|
| COXTT4  | TTHERM_00338<br>280  | I7M1Q4 | nuclear | 402 | SURF1 family protein |
| COXTT5  | TTHERM_00046<br>440  | Q23DP7 | nuclear | 385 | TraB family protein  |
| COXTT6  | TTHERM_00047<br>230  | Q23DG8 | nuclear | 348 |                      |
| COXTT7  | TTHERM_00675<br>650  | Q23DZ5 | nuclear | 318 |                      |
| COXTT8  | TTHERM_00070<br>850  | I7LTZ4 | nuclear | 318 | SURF1 family protein |
| COXTT9  | TTHERM_00525<br>160  | I7LY65 | nuclear | 252 |                      |
| COXTT10 | TTHERM_00420<br>130  | I7MD70 | nuclear | 234 |                      |
| COXTT11 | TTHERM_00093<br>9159 | W7X4J9 | nuclear | 231 |                      |
| COXTT12 | TTHERM_00455<br>090  | I7M3P9 | nuclear | 215 |                      |
| COXTT14 | TTHERM_00530<br>650  | I7LZX8 | nuclear | 210 |                      |
| COXTT15 | TTHERM_00641<br>250  | Q23F08 | nuclear | 193 |                      |
| COXTT16 | TTHERM_00218<br>840  | I7M8Y9 | nuclear | 175 | AAA protein fold     |
| COXTT17 | TTHERM_00049<br>040  | Q23D87 | nuclear | 173 |                      |
| COXTT18 | TTHERM_00218<br>570  | I7MKT6 | nuclear | 173 |                      |
| COXTT19 | TTHERM_00433<br>830  | Q230X6 | nuclear | 170 |                      |
| COXTT20 | TTHERM_00794<br>470  | Q23VY4 | nuclear | 158 |                      |

|         |                      |            |         |     |                                              |
|---------|----------------------|------------|---------|-----|----------------------------------------------|
| COXTT21 | TTHERM_00938<br>940  | Q22DP8     | nuclear | 154 |                                              |
| COXTT22 | TTHERM_00691<br>100  | I7MFV5     | nuclear | 149 |                                              |
| COXTT23 | TTHERM_00666<br>370  | Q23TE5     | nuclear | 124 |                                              |
| COXTT24 | TTHERM_00161<br>000  | Q22W32     | nuclear | 122 |                                              |
| COXTT25 | TTHERM_00151<br>580  | I7M9E7     | nuclear | 105 |                                              |
| COXTT26 | TTHERM_00485<br>790  | I7LTF1     | nuclear | 90  |                                              |
| COXTT27 | TTHERM_00030<br>2101 | W7XDH<br>2 | nuclear | 212 | (Including subunit<br>COXTT3 in Zhou et al.) |
| COXTT28 | TTHERM_00093<br>3397 | W7X912     | nuclear | 171 |                                              |

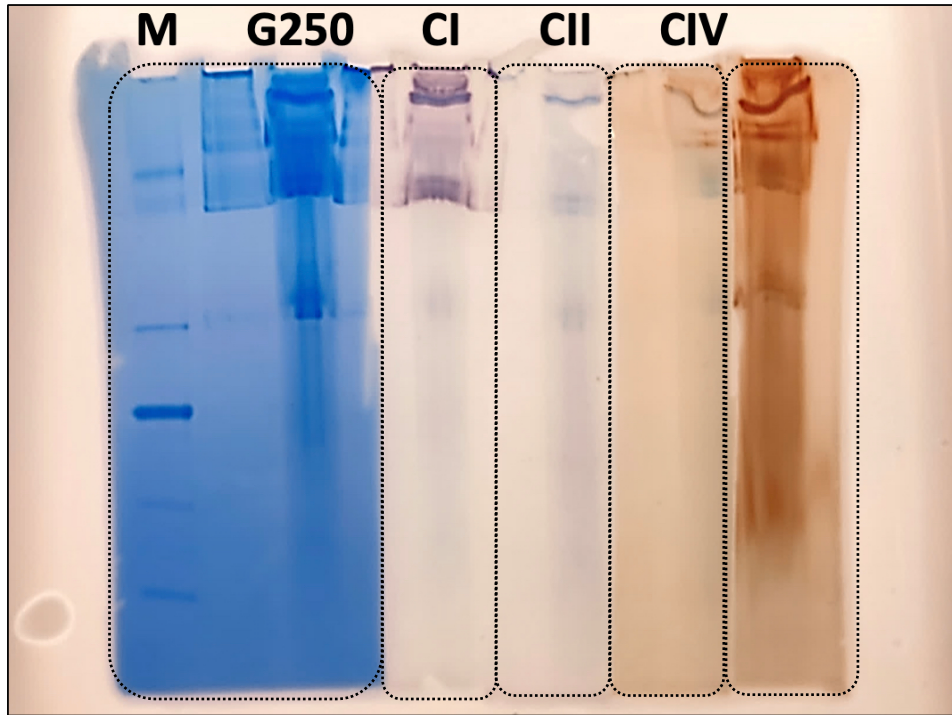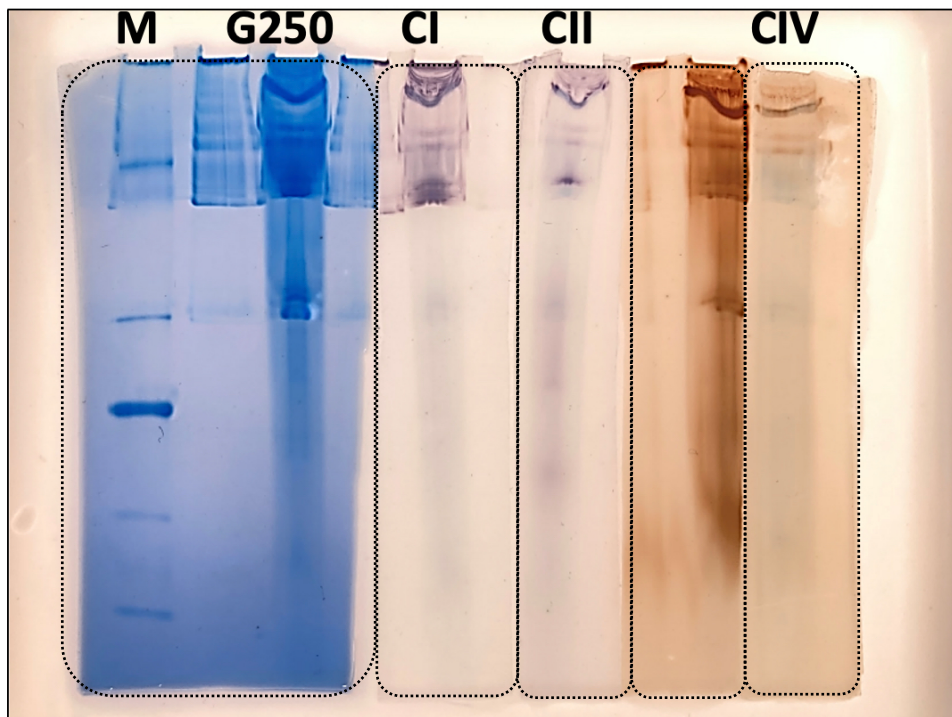

**Source data for Extended Data Figure 2.** CN-PAGE was performed to separate protein assemblies within the final sucrose cushion sample. After electrophoresis, the gel lanes were cut and incubated with different reagents to reveal the presence of proteins in the marker (M) and sample (G250) lanes, active complex I (CI), complex II (CII) or complex IV (CIV) within remaining sample lanes. The lanes were then juxtaposed to reconstruct the full gel. The two CN-PAGE gels were obtained from two separate supercomplex preparations.
